# Supplementary material
Source: PubMed Central journal article supplement (PMC3656456)
Supplement: supp_blood-2012-08-453043_blood-2012-08-453043-1.pdf [file supp_blood-2012-08-453043_blood-2012-08-453043-1.pdf]

# Supplementary Materials for

## **Soluble Vascular Endothelial Growth Factor Receptor-3 (sVEGFR-3) is Essential for Corneal Aymphaticity**

Nirbhai Singh\*, Michelle Tiem, Ryan Watkins, Yang Kyung Cho, Ying Wang, Thomas Olsen, Hironori Uehara, Christina Mamalis, Ling Luo, Zackery Oakey, Balamurali K. Ambati\*

\*To whom correspondence should be addressed. E-mail: [bala.ambati@utah.edu](mailto:bala.ambati@utah.edu) or [nirbhais@gmail.com](mailto:nirbhais@gmail.com)

Figs. S1 to S4

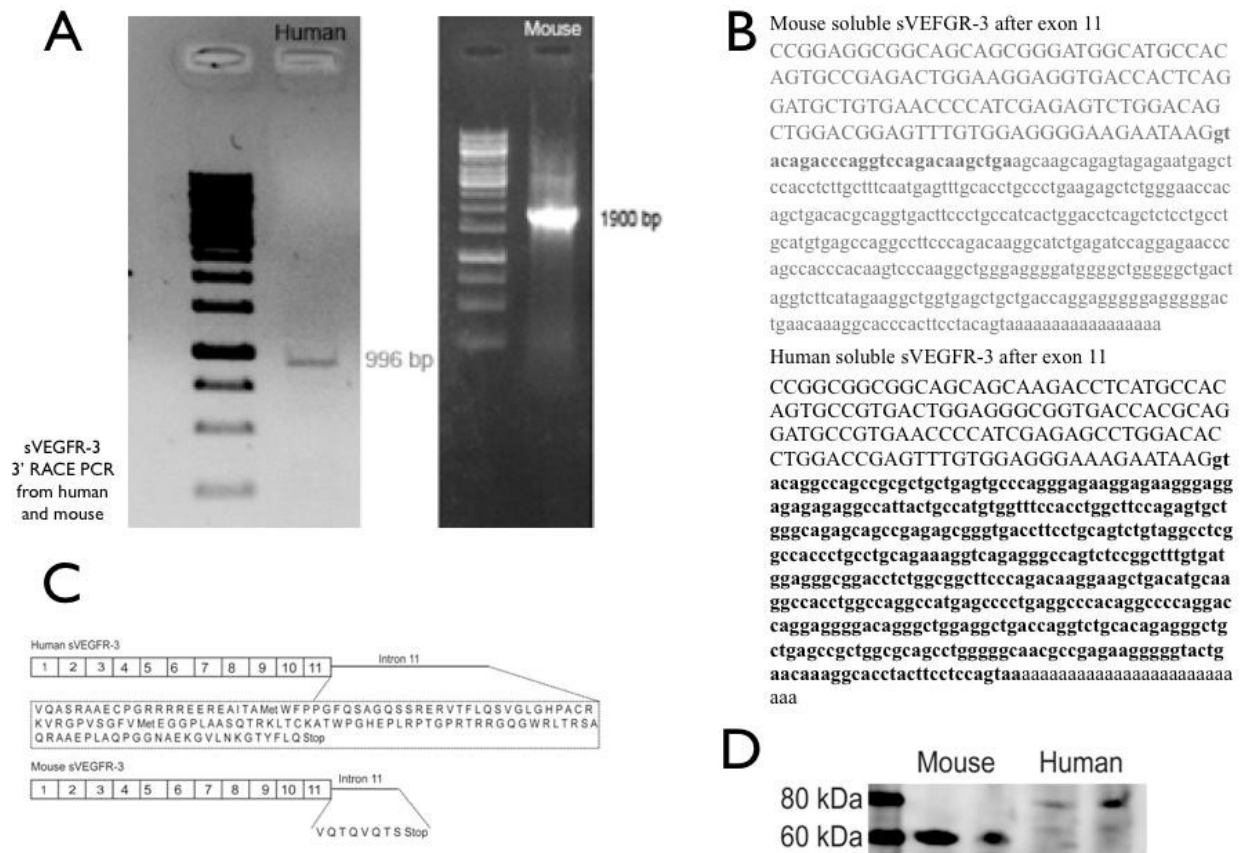

**Fig. S1.** Identification of human and mouse sVEGFR-3 using 3' RACE. **(A)** 3'RACE PCR for human sVEGFR-3, human; using forward primer spanning exon 7-8 boundary (Hu Exon 7-8 Primer: GCACCGAGGTCATTGTGCATGAAA) and Reverse primer (ACTGGAGGAAGTAGGTGCCTTTGT) and mouse exon 1-2 boundary (GACTCCTCCAAGGCCTGGCAAAT) and Q1 primer (GAGGACTCGAGCTCAAGC). Once 3' end sequence was known, the full-length sVEGFR-3 of Human and mouse was cloned using exon 1 and 3' terminal region primers. **(B)** Mouse and human sVEGFR-3 onward exon 11, exon (capital letters) and intron region (small letters), bold letters of intron showing the region that is translated. Mouse sVEGFR-3 mRNA is 1992bp long. Mouse mRNA has 338 bp

unique intron derived tail from intron 11, out of which first 27bp are translated into protein. Mouse sVEGFR-3 has a coding region of 1575 bp encoding 59.5 kDa protein. Human sVEGFR-3 mRNA consists of 2067 bp and 414 bp unique intron derived tail from intron 11 coding for 137 unique amino acids. Human sVEGFR-3 has a coding region of 1962 bp encoding 73.19 kDa protein. **(C)** Representative diagram showing the unique amino acids derived from intron 11 of human and mouse sVEGFR-3. **(D)** Representative western blot of mouse and human cornea with antibody specific to anti N-terminal end of VEGFR-3 demonstrates sVEGFR-3 at 60 and 73 kDa, respectively (n=5).

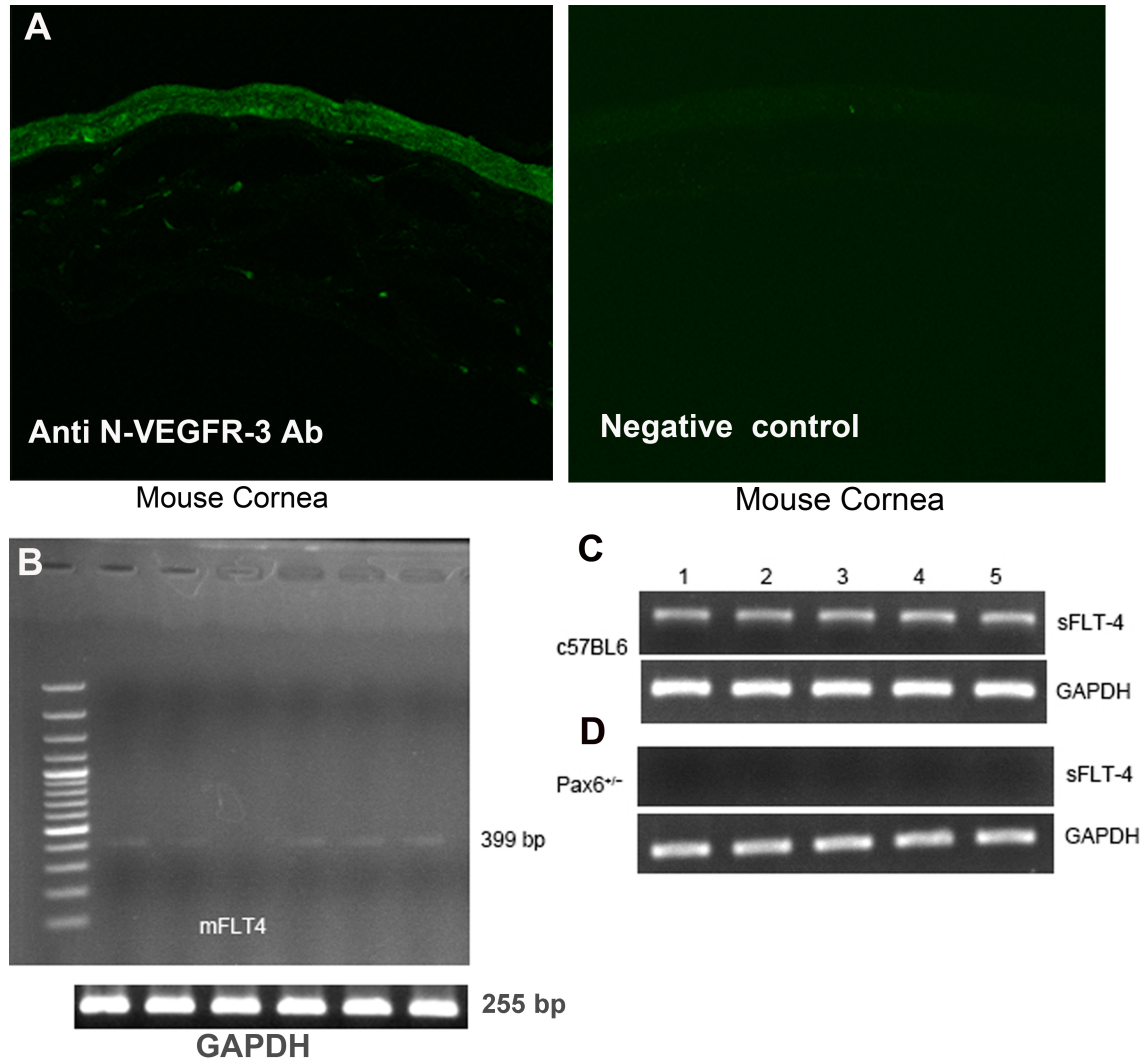

**Fig. S2.** Cornea expresses soluble VEGFR-3 and no or minimal levels of membrane VEGFR-3, while *Pax6*<sup>+/-</sup> mice, the strain spontaneously develop blood and lymphatic vessels in cornea, do not express detectable levels of sVEGFR-3. **(A)** Immunofluorescent detection of sVEGFR-3 using anti N-terminal end antibody specific to VEGFR-3 reveals sVEGFR-3 localization in C57BL/6 mouse corneal epithelium. Isotype-negative control antibody was used to control for nonspecific staining **(B)** RT PCRs from cornea total RNA using primers specific to exon 14 onward (present only in membrane VEGFR-3 only) show minimal to no expression of mVEGFR-3 in cornea (n=6). **(C)** RT PCR'S, with reverse primer in unique intron tail and

forward primers at exon-exon junctions, show sVEGFR-3 in Normal C57BL/6J mice cornea.

**(D)** RT PCR for sVEGFR-3 show absence of sVEGFR-3 in *Pax6*<sup>+/-</sup> mice cornea (*n*=5).

**A** RNAi target sites on mouse sVEGFR-3/sFLT-4

CCGGAGGCGGCAGCAGCGGGATGGCATGCCACAGTGCCGAGACTGGAAGGAGG  
 TGACCACTCAGGATGCTGTGAACCCCATCGAGAGTCTGGACAGCTGGACGGAGT  
 TTGTGGAGGGGAAGAATAAGgtacagaccaggtcagacaagctgaagcaagcagagtagagaatgagctc  
 cacctcttgccttcaatgagttgacactgccctgaagagctctgggaaccacagctgacacgcaggtgacttcctgccatcactgga  
 cctcagctctcctgctgcatgtgagccaggcctfccagacaaggcatctgagatccaggagaaccagccaccacaagtcccaa  
 ggctgggaggggatggggctgggggctgactaggtctcatagaaggctggtgagctgctgaccaggagggggagggggactga  
 acaaaggcaccactcctacaaaaaaaaaaaaaaaaaaaa

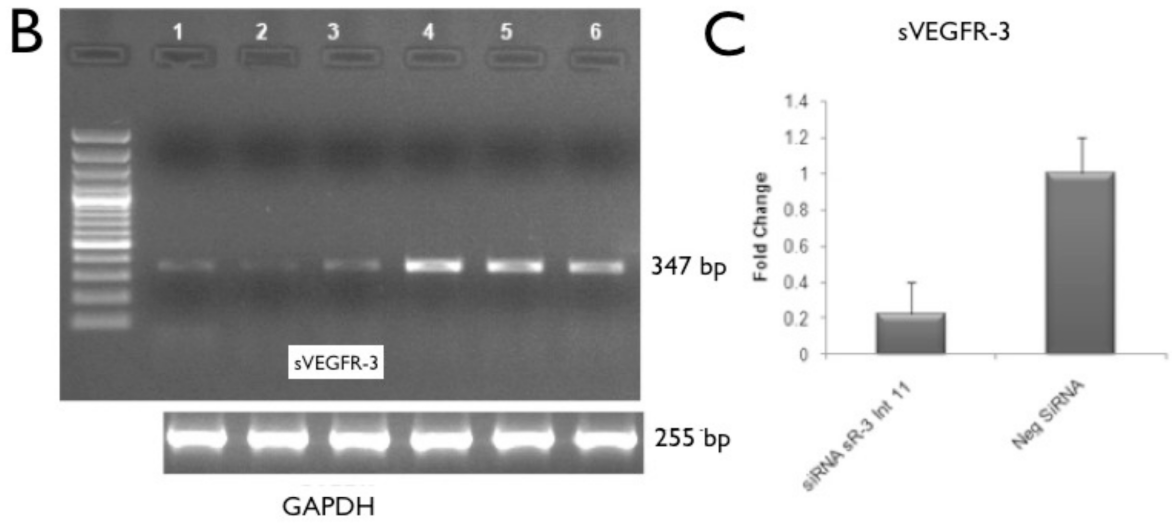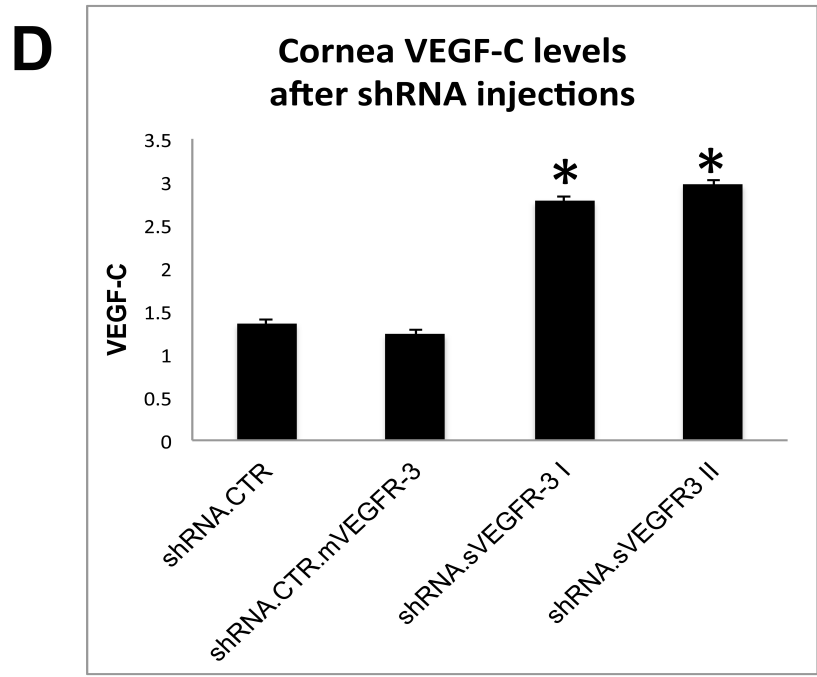

**Fig. S3.** Target sites on sVEGFR-3 used to design siRNA and shRNA. **(A)** Mouse exon 11 (capital letters) and intron 11 (lower case) of sVEGFR-3 showing the target sites (underlined)

for RNAi. **(B)** RT PCR for sVEGFR-3 on day 3 of mouse cornea injected with pshRNA-sVEGFR-3 (Lane 1-3) and pshRNA-CTR (Lane 4-6) showing knockdown of sVEGFR-3 in mouse cornea. **(C)** SVEC4-10 cell line transfected with siRNA-sVEGFR-3 and siRNA-CTR show knockdown of sVEGFR-3 up to 80% after 48 hrs of transfection. **(D)** ELISA for VEGF-C demonstrates that mouse corneas injected with shRNA against sVEGFR-3 express higher free VEGF-C levels after 48 hrs of injection.

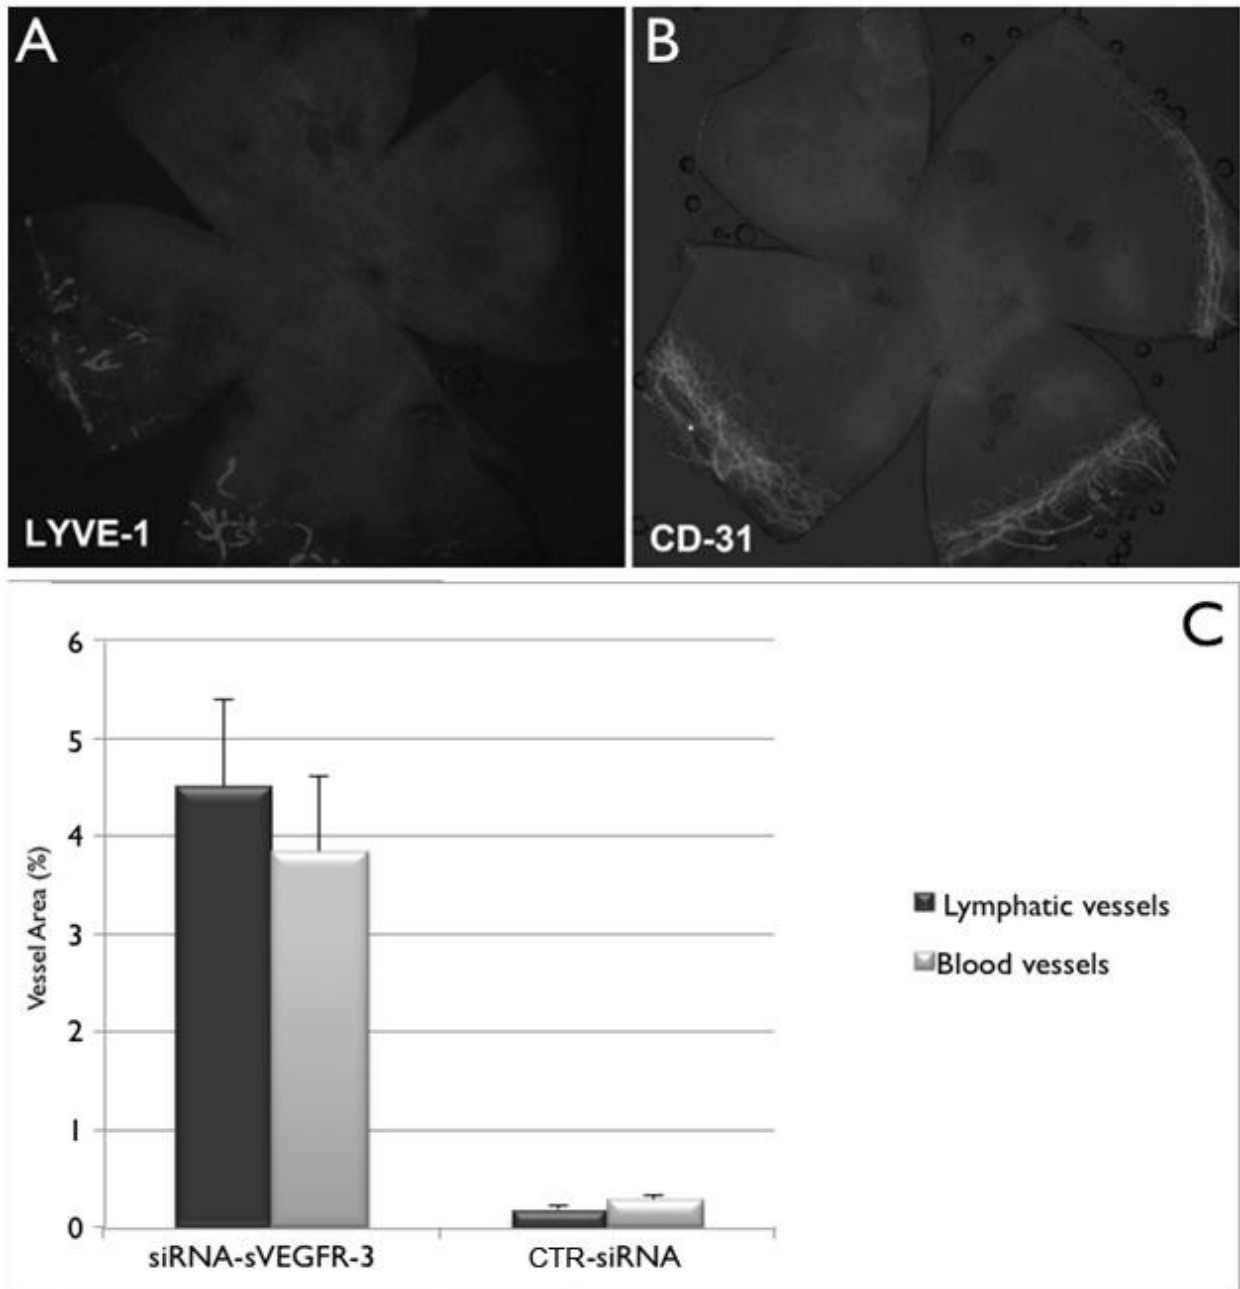

**Fig. S4.** Injection of cornea with siRNA sVEGFR-3 mouse cornea flatmounts stained with LYVE-1 (A) and CD-31 (B) staining, injected with two injections of siRNA-sVEGFR-3 and control siRNA after every 3 days lead to increase of (C) 4.5% lymphatic and 3.8% blood vessel area. Corneas harvested after 7 days of injections ( $n=10$ ).
